# Supplementary material for: A Reverse-Transcription Loop-Mediated Isothermal Amplification Technique to Detect Tomato Mottle Mosaic Virus, an Emerging Tobamovirus
Source: MDPI journal article supplement (doi:10.3390/v15081688), 2023-08-03
Supplement: s1 [file s1]

**Table S1.** Tobamoviruses used for primer design and the experiments in this study.

| Species                         | Isolate name     | Origin      | GenBank accession no. |
|---------------------------------|------------------|-------------|-----------------------|
| tomato mottle mosaic virus      | MX5              | Mexico      | KF477193              |
|                                 | 12-515LLE-1      | USA         | KM000123              |
|                                 | 10-100           | USA         | KP202857              |
|                                 | YYMLJ            | China       | KR824950              |
|                                 | TiLhaLJ          | China       | KR824951              |
|                                 | NY-13            | USA         | KT810183              |
|                                 | VLC-1            | Spain       | KU594507              |
|                                 | SC13-05          | USA         | KX898033              |
|                                 | CA16-01          | USA         | KX898034              |
|                                 | Hainan           | China       | MG171192              |
|                                 | Hn18             | China       | MG920804              |
|                                 | Hn19             | China       | MG920805              |
|                                 | Hn23             | China       | MG920806              |
|                                 | CpB1             | Brazil      | MH128145              |
|                                 | HN               | China       | MH381817              |
|                                 | 19-02305         | Netherlands | MN654021              |
|                                 | LN               | China       | MN853592              |
|                                 | Shandong         | China       | MW373515              |
|                                 | SY11026          | unknown     | MW441234              |
|                                 | DSMZ PV-1267     | USA         | MW582804              |
|                                 | NVWA5785660      | Netherlands | MZ713255              |
|                                 | NVWA36783860     | China       | MZ713256              |
|                                 | NVWA41106813     | China       | MZ713257              |
|                                 | GD-2020          | China       | OK180812              |
|                                 | ToMMV_83         | Viet Nam    | OK334224              |
|                                 | DSMZ PV-1342     | Mauritius   | ON013925              |
|                                 | MZWD             | China       | ON146334              |
|                                 | NPPO-NL 41979470 | Netherlands | ON987482              |
|                                 | NPPO-NL 41979438 | France      | ON987481              |
|                                 | NPPO-NL 41979411 | Spain       | ON987480              |
| tobacco mosaic virus            | Variant1         | unknown     | V01408                |
|                                 | OM               | Japan       | D78608                |
| tomato mosaic virus             | Queensland       | Australia   | AF332868              |
|                                 | L                | Japan       | X02144                |
| tomato brown rugose fruit virus | Tom1-Jo          | Jordan      | KT383474              |
|                                 | DSMZ PV-1241     | Israel      | MZ202349              |

|                           |          |       |          |
|---------------------------|----------|-------|----------|
| rehmannia mosaic virus    | Henan    | China | EF375551 |
|                           | Japanese | Japan | AB628188 |
| paprika mild mottle virus | Japanese | Japan | AB089381 |

---
